# Supplementary material for: Air-stable and reusable cobalt ion-doped titanium oxide catalyst for alkene hydrosilylation
Source: Royal Society of Chemistry journal article supplement (doi:10.1039/c9gc01981b), 2019-01-01
Supplement: c9gc01981b1.pdf [file c9gc01981b1.pdf]

## Supporting Information

### Air-Stable and Reusable Cobalt Ion-doped Titanium Oxide Catalyst for Alkene Hydrosilylation

*Takato Mitsudome,\*<sup>a</sup> Shu Fujita,<sup>a</sup> Min Sheng,<sup>a</sup> Jun Yamasaki,<sup>b</sup> Keita Kobayashi,<sup>c</sup>  
Tomoko Yoshida,<sup>d</sup> Zen Maeno,<sup>e</sup> Tomoo Mizugaki,<sup>a</sup> Koichiro Jitsukawa<sup>a</sup> and Kiyotomi Kaneda<sup>a,f</sup>*

<sup>a</sup>Department of Materials Engineering Science, Graduate School of Engineering Science, Osaka University, 1-3 Machikaneyama, Toyonaka, Osaka, 560-8531, Japan

<sup>b</sup>Research Center for Ultra-High Voltage Electron Microscopy, Osaka University, 7-1, Mihogaoka, Ibaraki, Osaka 567-0047, Japan

<sup>c</sup>Research Institute for Material and Chemical Measurement, National Metrology Institute of Japan, National Institute of Advanced Industrial Science and Technology (AIST), 1-1-1 Higashi, Tsukuba, 305-0046, Japan

<sup>d</sup>Advanced Research Institute for Natural Science Technology, Osaka City University, 3-3-138 Sugimoto, Sumiyoshi-ku, Osaka, 558-8585, Japan

<sup>e</sup>Institute for Catalysis, Hokkaido University, N-21, W-10, Sapporo 001-0021, Japan

<sup>f</sup>Research Center for Solar Energy Chemistry, Osaka University, 1-3 Machikaneyama, Toyonaka, Osaka, 560-8531, Japan

## Table of Contents

### 1. General experimental details

### 2. Catalyst preparation

### 3. Typical reaction procedure

### 4. Recycling experiments

### 5. Hot filtration experiment

**Fig. S1** Hot filtration experiment of Co/TiO<sub>2</sub> without H<sub>2</sub> treatment in hydrosilylation of **1** with **2**.

### 6. Characterization of Co/TiO<sub>2</sub>

**Fig. S2** XRD patterns of (a) CoO, (b) Co<sub>3</sub>O<sub>4</sub>, (c) TiO<sub>2</sub>, and (d) Co/TiO<sub>2</sub>.

**Fig. S3** TEM images of (a) fresh and (b) used Co/TiO<sub>2</sub>.

**Fig. S4** UV–Vis absorption spectra of (a) Co/TiO<sub>2</sub>, (b) Co/TiO<sub>2</sub> without H<sub>2</sub> treatment, and (c) TiO<sub>2</sub>.

**Table S1** Crystal structure data of TiO<sub>2</sub>

### 7. Product identification

## References

## 1. General experimental details

All organic reagents were purified before use.  $\text{Co}(\text{NO}_3)_2$ ,  $\text{Fe}(\text{NO}_3)_3$ ,  $\text{Cu}(\text{NO}_3)_2$ ,  $\text{Ni}(\text{NO}_3)_2$ , HAP (monoclinic), and CoO were purchased from Wako Pure Chemical Industries.  $\text{Al}_2\text{O}_3$  (AKP-G015) was obtained from Sumitomo Chemical Company.  $\text{SiO}_2$  (Q-6) was purchased from Fuji Silysia Chemicals.  $\text{TiO}_2$  (JRC TIO-4(2)) and  $\text{CeO}_2$  (JRC CEO-2) were provided by the Catalysis Society of Japan as reference catalysts. MgO was purchased from Ube Industries.  $^1\text{H}$  nuclear magnetic resonance (NMR) spectra were recorded using a JEM-ARM200F spectrometer. TEM was performed at 200 kV. Co K-edge X-ray absorption spectra were recorded at room temperature using a Si (311) or Si (111) monochromator at the BL01B1 and BL14B2 lines, SPring-8, Japan Synchrotron Radiation Research Institute (JASRI), Harima, Japan. UV–Vis spectra were recorded using a JASCO V-660 spectrometer. XRD was performed using a Philips X'Pert-MPD diffractometer with  $\text{Cu-K}\alpha$  radiation.

## 2. Catalyst preparation

Co/ $\text{TiO}_2$  was prepared as follows.  $\text{TiO}_2$  (0.5 g) was soaked in an aqueous solution of  $\text{Co}(\text{NO}_3)_2$  (50 mL, 2.5 mM). After stirring for 2 min, the mixture was adjusted to pH 10.0 with aqueous NaOH solution (100 mM) and stirred at room temperature for 6 h in air. The resulting slurry was filtered, and the recovered solid was washed with deionized water and dried at room temperature in vacuo. The obtained powder was calcined at 500 °C for 5 h. Co-containing  $\text{TiO}_2$  was then treated under  $\text{H}_2$  at atmospheric pressure and 250 °C for 2 h, affording Co/ $\text{TiO}_2$  as a pale green powder. The same procedure was used to prepare other  $\text{TiO}_2$ -supported catalysts, namely, Fe/ $\text{TiO}_2$ , Cu/ $\text{TiO}_2$ , and Ni/ $\text{TiO}_2$ , from  $\text{Fe}(\text{NO}_3)_3$ ,  $\text{Cu}(\text{NO}_3)_2$ , and  $\text{Ni}(\text{NO}_3)_2$ , respectively, and other Co/support catalysts, namely, Co/ $\text{Al}_2\text{O}_3$ , Co/ $\text{CeO}_2$ , Co/hydroxyapatite, Co/MgO, and Co/ $\text{SiO}_2$ .

## 3. Typical reaction procedure

A typical reaction procedure for the hydrosilylation of **1** with **2** using Co/ $\text{TiO}_2$  was as follows. Co/ $\text{TiO}_2$  powder (0.12 g) was placed in a reaction vessel, and **1** (3.0 mmol) and **2** (3.6 mmol) were added. The reaction mixture was stirred vigorously at 100 °C under an Ar atmosphere for

30 min. After the reaction, Co/TiO<sub>2</sub> was removed by filtration and the reaction solution was analyzed by NMR spectroscopy. The hydrosilylation of **1** with **2** using [Co<sub>2</sub>(CO)<sub>8</sub>] (0.015 mmol) was conducted under the same reaction conditions, except with the reaction time extended to 14 h and the temperature decreased to 40 °C.

#### 4. Recycling experiments

After the catalytic reaction, Co/TiO<sub>2</sub> was removed by filtration and the yield was determined by NMR spectroscopy. The catalyst was washed with a mixture of hexane/acetone (1:1) and calcined at 500 °C for 5 h, followed by treatment with H<sub>2</sub> at atmospheric pressure and 250 °C for 2 h before reuse. A TEM image of the used Co/TiO<sub>2</sub> catalyst (Fig. S3) contained no recognizable Co aggregates.

#### 5. Hot filtration experiment

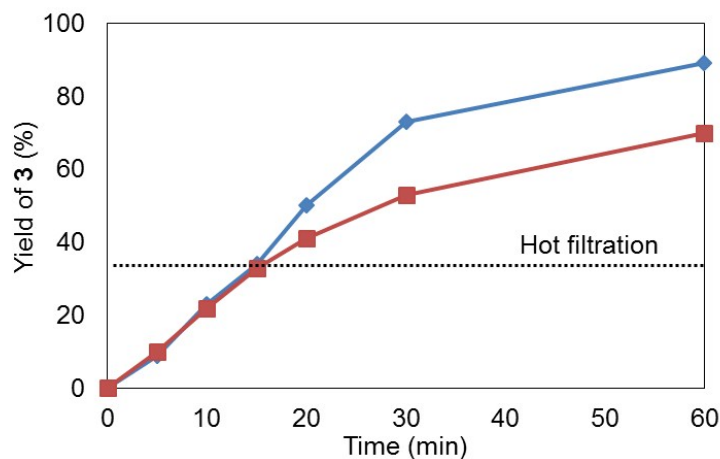

**Fig. S1** Hot filtration experiment of Co/TiO<sub>2</sub> without H<sub>2</sub> treatment in hydrosilylation of **1** with **2**.

## 6. Characterization of Co/TiO<sub>2</sub>

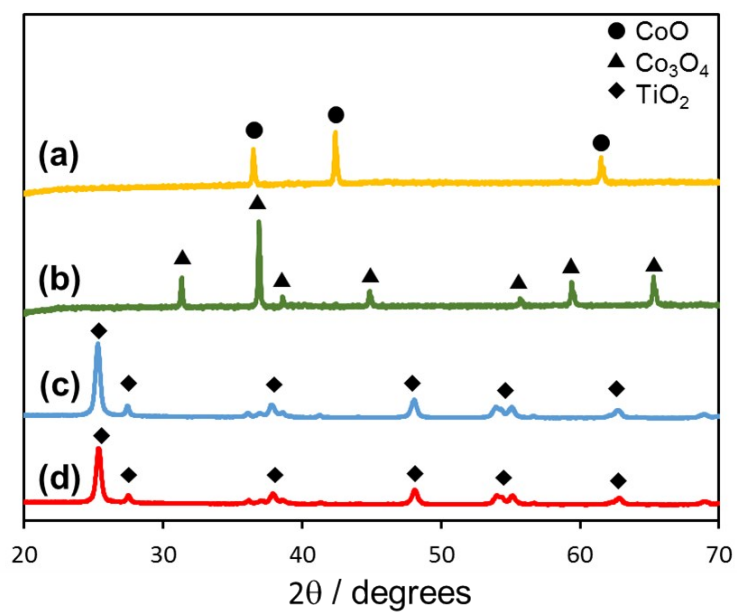

**Fig. S2** XRD patterns of (a) CoO, (b) Co<sub>3</sub>O<sub>4</sub>, (c) TiO<sub>2</sub>, and (d) Co/TiO<sub>2</sub>.

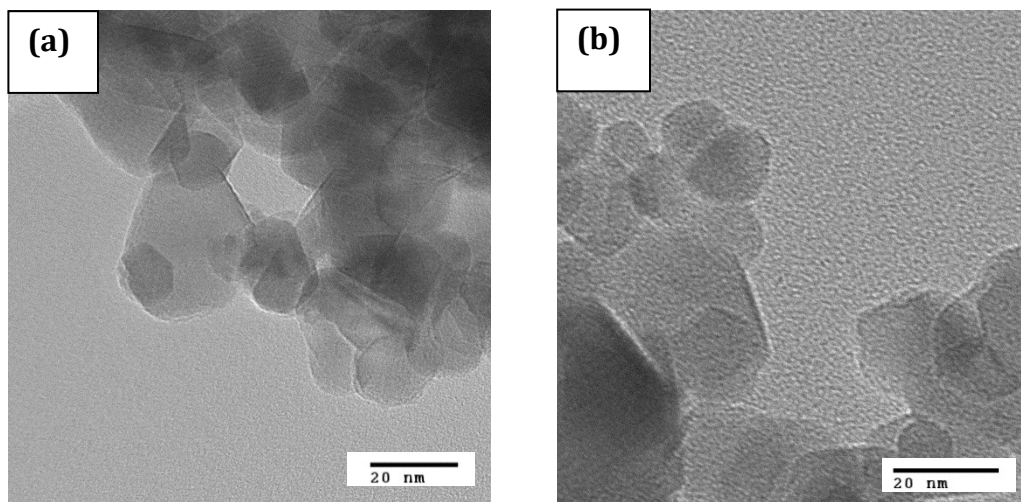

**Fig. S3** TEM images of (a) fresh and (b) used Co/TiO<sub>2</sub>.

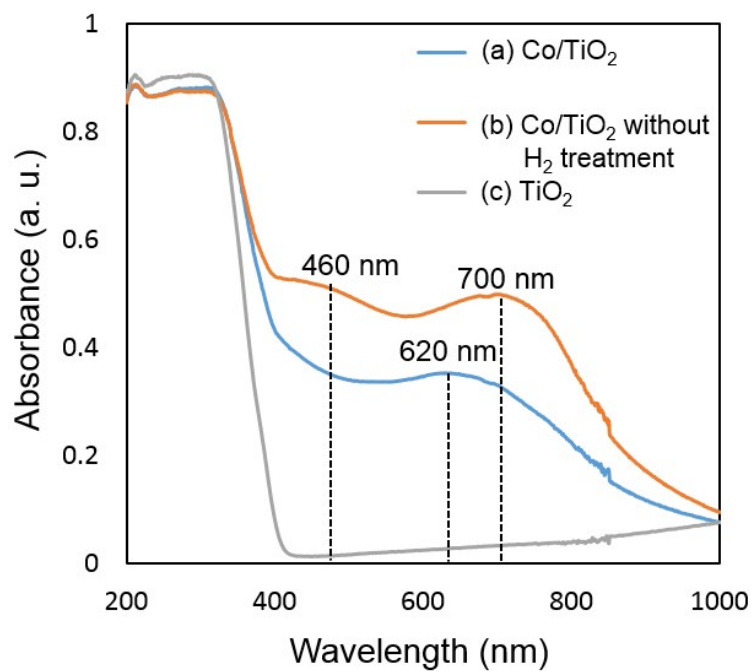

**Fig. S4** UV–Vis absorption spectra of (a) Co/TiO<sub>2</sub>, (b) Co/TiO<sub>2</sub> without H<sub>2</sub> treatment, and (c) TiO<sub>2</sub>.

**Table S1** Crystal structure data of TiO<sub>2</sub>

| Form    | CN | Ti-O bond length (Å) | Ref. |
|---------|----|----------------------|------|
| Anatase | 6  | 1.943                | S1   |
|         | 4  | 1.968                | S2   |
|         | 2  | 2.050                | S2   |
| Rutile  | 4  | 1.952                | S3   |
|         | 2  | 1.983                | S3   |

## 7. Product identification

The substrates and products were characterized using NMR spectroscopy. <sup>1</sup>H-NMR chemical shifts of the substrates and products were in agreement with previously reported values (Table 2, entries 1, 4, 5 and 8-12) (Ref. S4–S8).

Table 2, entry 1

### **Dimethyl(1-octyl)phenylsilane (S4)**

CAS registry No. [64545-08-6]. <sup>1</sup>H-NMR (400 MHz, CDCl<sub>3</sub>, ppm): δ 7.53–7.47 (m, 2H), 7.37–7.31 (m, 3H), 1.35–1.20 (m, 12H), 0.87 (t, *J* = 6.9 Hz, 3H), 0.74 (t, *J* = 7.8 Hz, 2H), 0.25 (s, 6H).

Table 2, entry 2

### **Dimethyl(1-hexadecyl)phenylsilane**

CAS registry No. [1356606-18-2]. <sup>1</sup>H-NMR (400 MHz, CDCl<sub>3</sub>, ppm): δ 7.54–7.48 (m, 2H), 7.38–7.32 (m, 3H), 1.36–1.20 (m, 30H), 0.88 (t, *J* = 6.9 Hz, 3H), 0.74 (t, *J* = 7.8 Hz, 2H), 0.25 (s, 6H).

Table 2, entry 3

### **Dimethyl(4-methylpentyl)phenylsilane**

CAS registry No. [1356955-42-4]. <sup>1</sup>H-NMR (400 MHz, CDCl<sub>3</sub>, ppm): δ 7.55–7.46 (m, 2H), 7.37–7.30 (m, 3H), 1.53 (sept, *J* = 7.7 Hz, 1H), 1.37–1.27 (m, 2H), 1.23–1.14 (m, 2H), 0.83 (d, *J* = 6.4 Hz, 6H), 0.75–0.69 (m, 2H), 0.25 (s, 6H).

Table 2, entry 4

**(2-(Cyclohex-3-en-1-yl)ethyl)dimethyl(phenyl)silane (S4)**

CAS registry No. [61518-54-5]. <sup>1</sup>H-NMR (400 MHz, CDCl<sub>3</sub>, ppm): δ 7.53–7.48 (m, 2H), 7.38–7.32 (m, 3H), 5.66–5.62 (m, 2H), 2.18–1.93 (m, 3H), 1.80–1.69 (m, 1H), 1.66–1.54 (m, 1H), 1.48–1.38 (m, 1H), 1.33–1.23 (m, 2H), 1.22–1.10 (m, 1H), 0.83–0.71 (m, 2H), 0.25 (s, 6H).

Table 2, entry 5

**Dimethylphenyl(3-phenylpropyl)silane (S5)**

CAS registry No. [79294-25-0]. <sup>1</sup>H-NMR (400 MHz, CDCl<sub>3</sub>, ppm): δ 7.51–7.54 (m, 2H), 7.38–7.31 (m, 3H), 7.29–7.23 (m, 2H), 7.21–7.10 (m, 3H), 2.65–2.58 (m, 2H), 1.70–1.59 (m, 2H), 0.83–0.75 (m, 2H), 0.25 (s, 6H).

Table 2, entry 6

**4-[Dimethyl(phenyl)silyl]pentan-1-ol**

CAS registry No. [18410-33-8]. <sup>1</sup>H-NMR (400 MHz, CDCl<sub>3</sub>, ppm): δ 7.55–7.47 (m, 2H), 7.39–7.31 (m, 3H), 3.64–3.57 (m, 2H), 1.59–1.50 (m, 2H), 1.41–1.32 (m, 4H), 1.17 (t, *J* = 5.5 Hz, 2H), 0.80–0.73 (m, 2H), 0.26 (s, 6H).

Table 2, entry 7

**Methyl ester 11-[dimethyl(phenyl)silyl]undecanoic acid**

<sup>1</sup>H-NMR (400 MHz, CDCl<sub>3</sub>, ppm): δ 7.53–7.47 (m, 2H), 7.36–7.31 (m, 3H), 3.66 (s, 3H), 2.29 (t, *J* = 7.6 Hz, 2H), 1.37–1.15 (m, 16H), 0.74 (t, *J* = 7.6 Hz, 2H), 0.25 (s, 6H).



Table 2, entry 8

**1-[2-(dimethylphenylsilyl)ethyl]-2-pyrrolidinone (S5)**

CAS registry No. [2168585-68-8]. <sup>1</sup>H-NMR (400 MHz, CDCl<sub>3</sub>, ppm): δ 7.66–7.63 (m, 2H), 7.47–7.44 (m, 3H), 3.44–3.40 (m, 2H), 3.30–3.08 (m, 2H), 2.34–2.21 (m, 2H), 1.94–1.88 (m, 2H), 1.11–1.03 (m, 2H), 0.25 (s, 6H).

Table 2, entry 9

**Dimethyl(phenyl)[2-(trimethylsilyl)ethyl]silane (S6)**

CAS registry No. [17123-83-0]. <sup>1</sup>H-NMR (400 MHz, CDCl<sub>3</sub>, ppm): δ 7.56–7.47 (m, 2H), 7.34–7.30 (m, 3H), 0.68–0.60 (m, 2H), 0.45–0.37 (m, 2H), 0.25 (s, 6H), –0.04 (m, 9H).

Table 2, entry 10

**[2-(Dimethylphenylsilyl)ethyl]triethoxysilane (S5)**

CAS registry No. [61210-59-1]. <sup>1</sup>H-NMR (400 MHz, CDCl<sub>3</sub>, ppm): δ 7.54–7.44 (m, 2H), 7.37–7.29 (m, 3H), 3.83–3.72 (m, 6H), 1.25–1.12 (m, 9H), 0.81–0.73 (m, 2H), 0.58–0.50 (m, 2H), 0.25 (s, 6H).

Table 2, entry 11

**Octylphenylsilane (S7)**

CAS registry No. [18415-18-4]. <sup>1</sup>H-NMR (400 MHz, CDCl<sub>3</sub>, ppm): δ 7.61–7.57 (m, 2H), 7.40–7.35 (m, 3H), 4.32 (t, *J* = 3.8 Hz, 2H), 1.53–1.43 (m, 2H), 1.42–1.23 (m, 10H), 1.00–0.95 (m, 3H), 0.93–0.88 (m, 2H).

Table 2, entry 12

### Octyldiphenylsilane (S8)

CAS registry No. [136795-58-9]. <sup>1</sup>H-NMR (400 MHz, CDCl<sub>3</sub>, ppm): δ 7.57–7.53 (m, 4H), 7.38–7.33 (m, 6H), 4.85 (t, *J* = 3.8 Hz, 2H), 1.48–1.42 (m, 2H), 1.38–1.20 (m, 8H), 1.17–1.11 (m, 2H), 0.87 (t, *J* = 6.6 Hz, 3H).

### References

- S1. I. Djerdj and A. M. Tonejc, *J. Alloys Compd.*, 2006, **413**, 159.
- S2. T. E. Weirich, M. Winterer, S. Seifried and J. Mayer, *Acta Crystallogr., Sect. A*, 2002, **58**, 308.
- S3. S. E. Rasmussen, *Powder Diffr.*, 2003, **18**, 281.
- S4. A. D. Ibrahim, S. W. Entsminger, L. Zhu and A. R. Fout, *ACS Catal.*, 2016, **6**, 3589.
- S5. R. Zhou, Y. Y. Goh, H. Liu, H. Tao, L. Li and J. Wu, *Angew. Chem. Int. Ed.*, 2017, **56**, 16621.
- S6. K. Itami, K. Mitsudo, A. Nishino and J. Yoshida, *J. Org. Chem.*, 2002, **67**, 2645.
- S7. J. R. Carney, B. R. Dillon, L. Campbell and S. P. Thomas, *Angew. Chem. Int. Ed.*, 2018, **57**, 10620.
- S8. I. Buslov, J. Becouse, S. Mazza, M. Montandon-Clerc and X. Hu, *Angew. Chem. Int. Ed.*, 2015, **54**, 14523.
